# Supplementary material for: Mono- and bimetallic lanthanide(III) phenolic cryptates obtained by template reaction: solid state structure, photophysical properties and relaxivity †
Source: Royal Society of Chemistry journal article supplement (doi:10.1039/a906675f), 2000-01-01
Supplement: a906675f.doc [file a906675f.doc]

Mono- and bimetallic lanthanide(III) phenolic cryptates obtained by template reaction : solid state structure, photophysical properties and relaxivity

Carlos Platas,a,c Fernando Avecilla,a Andrés de Blas,a Teresa Rodríguez-Blas,a,*
Carlos F. G. C. Geraldes,b Éva Tóth,c André E. Merbachc and Jean-Claude G. Bünzlic,*

*a Departamento de Química Fundamental e Industrial, Universidade da Coruña, Campus de A Zapateira s/n 15071 A Coruña, Spain. E-mail: mayter@udc.es*

*b Departamento de Bioquímica, Faculdade de Ciências e Tecnologia, e Centro de Neurociências, Universidade de Coimbra, Apartado 3126, 3000 Coimbra, Portugal*

*c Institute of Inorganic and Analytical Chemistry, University of Lausanne, CH-1015 Lausanne, Switzerland. E-mail: jean-claude.bunzli@icma.unil.ch*

#### Supporting Information Available

**5 pages**

**Table S1** Selected angles (deg) for cryptates **4** and **7**

|  | 4 | 7 |  | 4 | 7 |
| --- | --- | --- | --- | --- | --- |
| O(3)-Dy(1)-O(1) | 74.6(2) | 73.12(17) | N(1)-Dy(1)-O(5) | 144.7(3) | 150.5(2) |
| O(3)-Dy(1)-O(2) | 93.8(2) | 76.37(17) | N(4)-Dy(1)-O(5) | 117.8(3) | 112.52(19) |
| O(1)-Dy(1)-O(2) | 70.1(2) | 66.06(17) | O(3)-Dy(1)-N(2) | 133.5(2) | 141.90(18) |
| O(3)-Dy(1)-O(6) | 120.0(2) | 115.40(18) | O(1)-Dy(1)-N(2) | 122.3(2) | 124.65(18) |
| O(1)-Dy(1)-O(6) | 142.4(2) | 139.54(17) | O(2)-Dy(1)-N(2) | 132.1(2) | 140.14(19) |
| O(2)-Dy(1)-O(6) | 74.2(2) | 77.40(17) | O(6)-Dy(1)-N(2) | 74.9(2) | 74.61(17) |
| O(3)-Dy(1)-N(3) | 75.6(3) | 78.98(19) | N(3)-Dy(1)-N(2) | 65.5(3) | 66.1(2) |
| O(1)-Dy(1)-N(3) | 140.4(3) | 138.38(19) | N(1)-Dy(1)-N(2) | 66.5(2) | 65.65(19) |
| O(2)-Dy(1)-N(3) | 137.5(2) | 135.39(19) | N(4)-Dy(1)-N(2) | 66.5(2) | 68.8(2) |
| O(6)-Dy(1)-N(3) | 76.1(3) | 80.51(19) | O(5)-Dy(1)-N(2) | 115.8(2) | 109.58(18) |
| O(3)-Dy(1)-N(1) | 83.5(2) | 97.41(19) | O(1)-Dy(2)-O(2) |  | 65.65(17) |
| O(1)-Dy(1)-N(1) | 70.6(2) | 69.32(17) | O(1)-Dy(2)-O(8) |  | 78.00(19) |
| O(2)-Dy(1)-N(1) | 139.8(2) | 134.83(18) | O(2)-Dy(2)-O(8) |  | 140.7(2) |
| O(6)-Dy(1)-N(1) | 140.5(2) | 140.24(17) | O(1)-Dy(2)-O(3) |  | 73.85(17) |
| N(3)-Dy(1)-N(1) | 80.8(2) | 84.7(2) | O(2)-Dy(2)-O(3) |  | 74.51(16) |
| O(3)-Dy(1)-N(4) | 155.4(2) | 148.90(18) | O(8)-Dy(2)-O(3) |  | 110.2(2) |
| O(1)-Dy(1)-N(4) | 82.0(2) | 83.69(19) | O(1)-Dy(2)-N(5) |  | 75.24(17) |
| O(2)-Dy(1)-N(4) | 70.7(2) | 75.39(18) | O(2)-Dy(2)-N(5) |  | 84.08(19) |
| O(6)-Dy(1)-N(4) | 75.2(2) | 70.39(19) | O(8)-Dy(2)-N(5) |  | 72.1(2) |
| N(3)-Dy(1)-N(4) | 128.7(2) | 131.2(2) | O(3)-Dy(2)-N(5) |  | 147.58(17) |
| N(1)-Dy(1)-N(4) | 95.9(2) | 93.3(2) | O(1)-Dy(2)-N(6) |  | 134.2(2) |
| O(3)-Dy(1)-O(5) | 70.3(3) | 67.94(18) | O(2)-Dy(2)-N(6) |  | 138.1(2) |
| O(1)-Dy(1)-O(5) | 121.5(2) | 125.38(16) | O(8)-Dy(2)-N(6) |  | 78.8(2) |
| O(2)-Dy(1)-O(5) | 67.4(2) | 68.61(17) | O(3)-Dy(2)-N(6) |  | 78.06(19) |
| O(6)-Dy(1)-O(5) | 50.6(2) | 47.58(17) | N(5)-Dy(2)-N(6) |  | 132.2(2) |
| N(3)-Dy(1)-O(5) | 70.3(2) | 67.83(19) | O(1)-Dy(2)-N(8) |  | 134.4(2) |
| N(6)-Dy(2)-N(7) |  | 67.4(2) | O(2)-Dy(2)-N(8) |  | 69.3(2) |
| N(8)-Dy(2)-N(7) |  | 66.1(2) | O(8)-Dy(2)-N(8) |  | 141.1(2) |
| O(1)-Dy(2)-O(9B) |  | 69.4(3) | O(3)-Dy(2)-N(8) |  | 101.0(2) |
| O(2)-Dy(2)-O(9B) |  | 126.4(3) | N(5)-Dy(2)-N(8) |  | 93.6(2) |
| O(8)-Dy(2)-O(9B) |  | 44.2(3) | N(6)-Dy(2)-N(8) |  | 85.8(3) |
| O(3)-Dy(2)-O(9B) |  | 66.2(2) | O(1)-Dy(2)-N(7) |  | 140.12(18) |
| N(5)-Dy(2)-O(9B) |  | 111.0(3) | O(2)-Dy(2)-N(7) |  | 125.20(19) |
| N(6)-Dy(2)-O(9B) |  | 66.5(3) | O(8)-Dy(2)-N(7) |  | 75.0(2) |
| N(8)-Dy(2)-O(9B) |  | 151.0(3) | O(3)-Dy(2)-N(7) |  | 143.54(18) |
| N(7)-Dy(2)-O(9B) |  | 107.8(3) | N(5)-Dy(2)-N(7) |  | 68.9(2) |

**Figure S1.** Excitation spectra of the [EuL(NO3)](NO3)2.4H2O complex (solid state, 10 K) in the
5D0  7F0 spectral range obtained by analyzing at different wavelengths.

**Figure S2.** Emission spectra of the [EuL(NO3)](NO3)2.4H2O complex in the solid state at 10 K by exciting at different energies : (A) exc = 22 075; (B) exc = 17 241; (C) exc = 17 234 and (D) exc = 17 229 cm-1.

**Figure S3.** Emission spectrum of the [EuL(NO3)](NO3)2.4H2O complex in the spectral ranges of the 5D07F1 (top) and 5D07F2 (bottom) transitions (solid state, 10 K) in correlation with the IR spectrum. The 5D0  7F0 transition was taken as the origin. * Peaks assigned to vibronic transitions.
